# Supplementary figures and images for: Preparation and measurement of a sandwiched Sn atomic beam source for laser resonance ionization mass spectrometry
Source: Royal Society of Chemistry journal article supplement (doi:10.1039/d4ra02689f), 2024-01-01

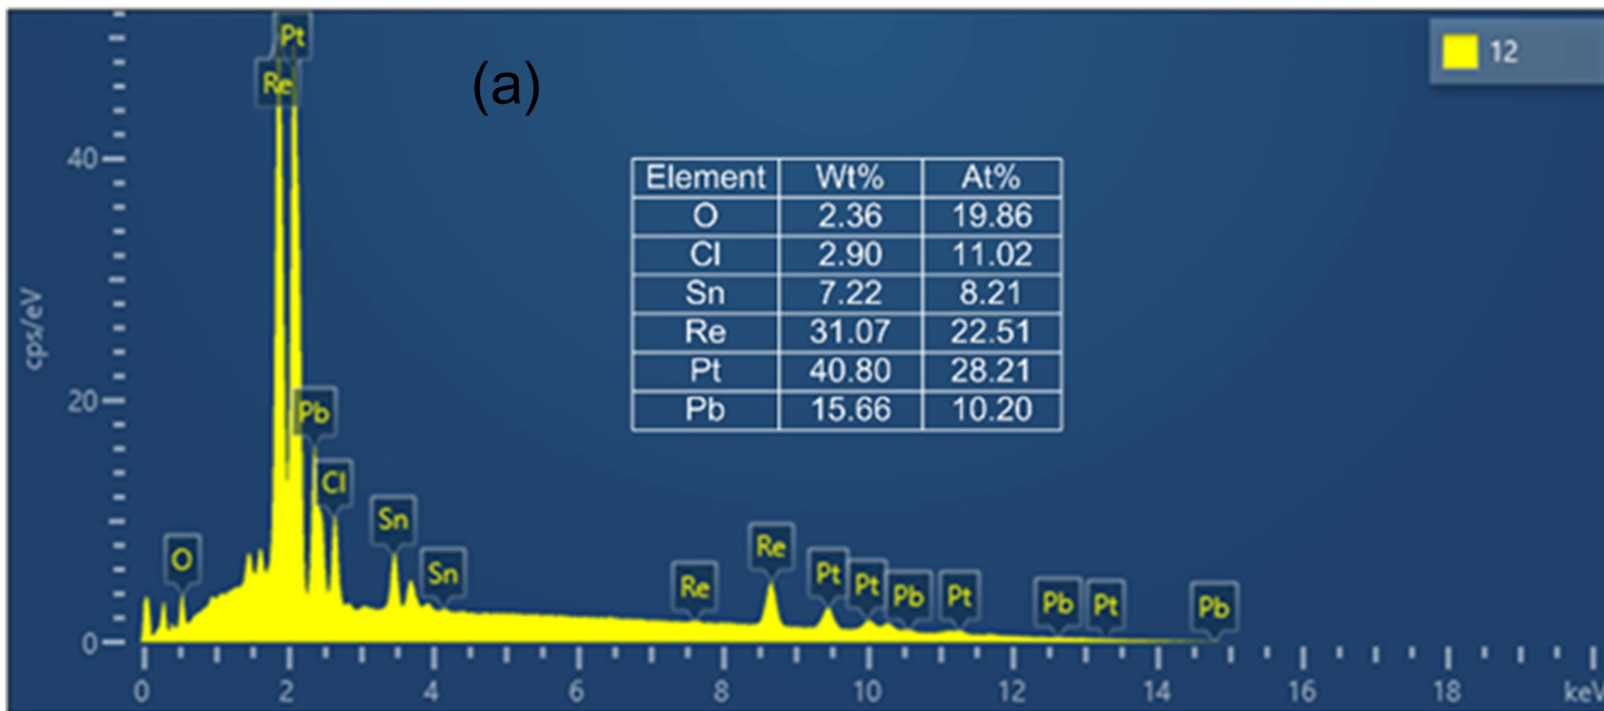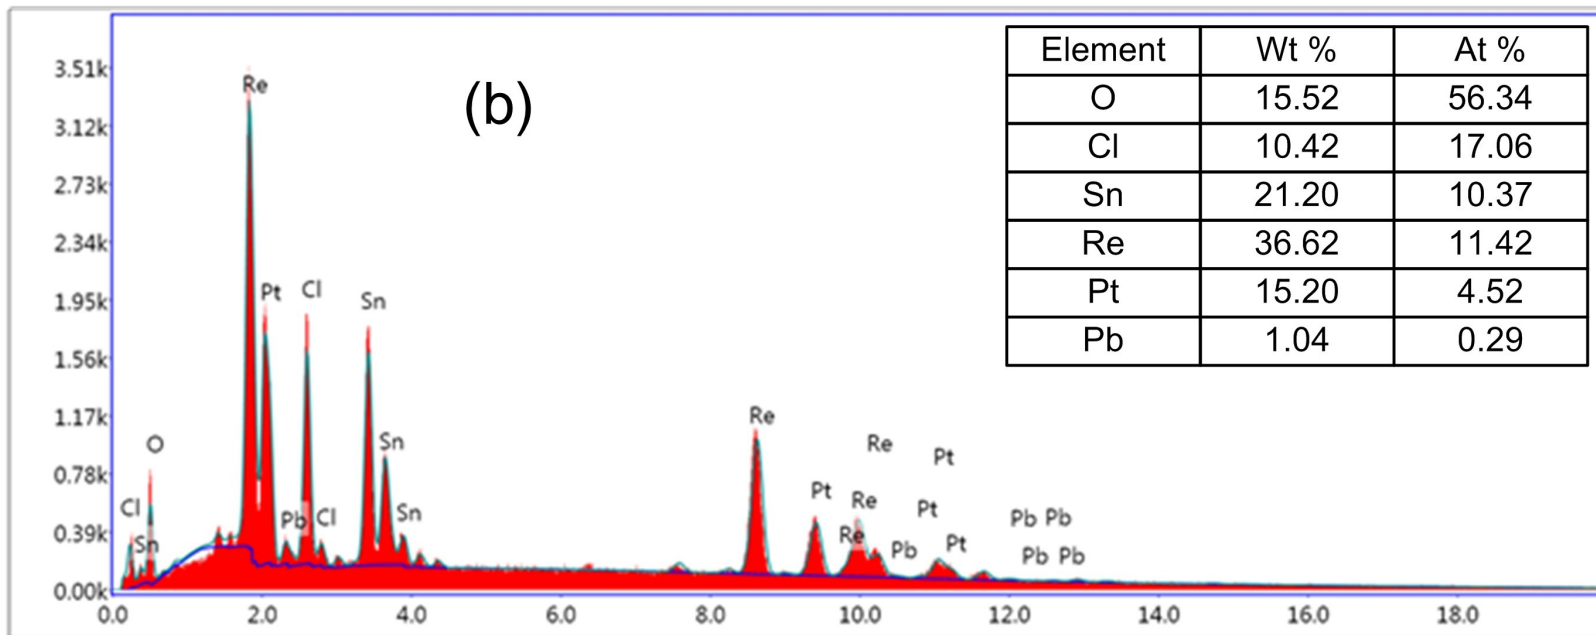

Supplement: d4ra02689f1.pdf [file d4ra02689f1.pdf]

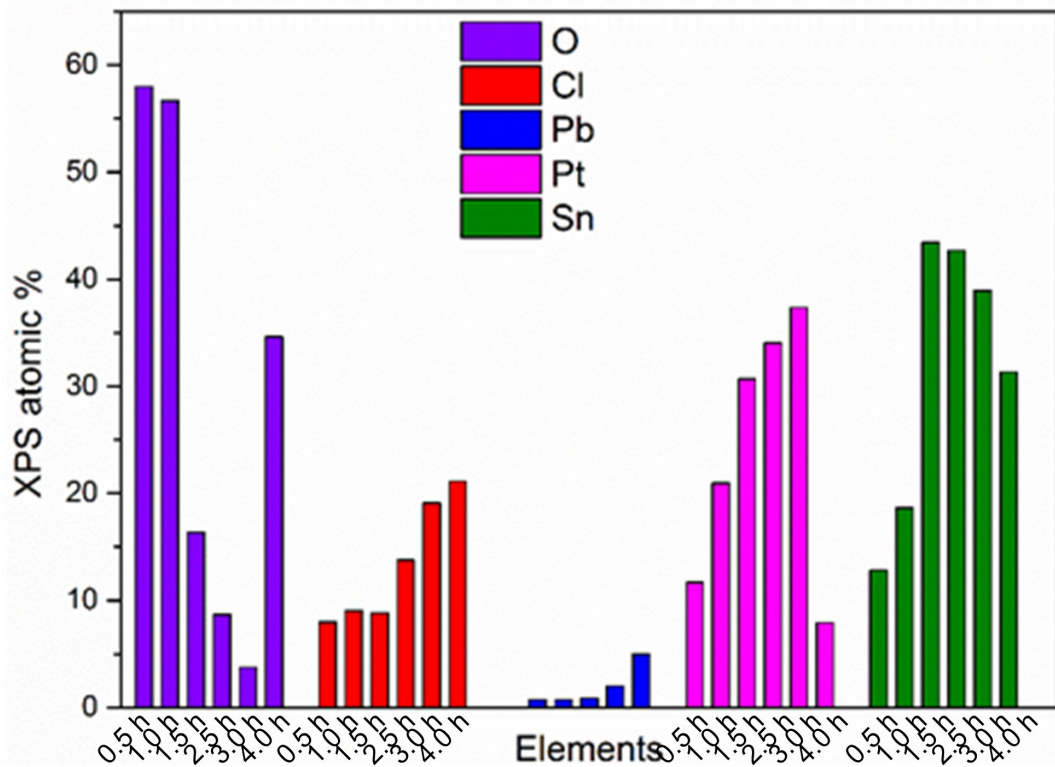

Supplement: d4ra02689f2.pdf [file d4ra02689f2.pdf]
